# Supplementary material for: Photocatalytic CO2reduction on Cu single atoms incorporated in ordered macroporous TiO2toward tunable products
Source: Royal Society of Chemistry journal article supplement (doi:10.1039/d2qi01155g), 2022-01-01
Supplement: d2qi01155g1.pdf [file d2qi01155g1.pdf]

## Electronic Supplementary Information

### Photocatalytic CO<sub>2</sub> reduction on Cu single atoms incorporated in ordered macroporous TiO<sub>2</sub> toward tunable products

Cong Chen <sup>a</sup>, Ting Wang <sup>a</sup>, Ke Yan <sup>a</sup>, Shoujie Liu <sup>b</sup>, Yu Zhao <sup>c</sup>, Benxia Li <sup>a,\*</sup>

<sup>a</sup> *Department of Chemistry, Key Laboratory of Surface & Interface Science of Polymer Materials of Zhejiang Province, Zhejiang Sci-Tech University, Hangzhou 310018, PR China*

<sup>b</sup> *Chemistry and Chemical Engineering of Guangdong Laboratory, Shantou 515063, P. R. China*

<sup>c</sup> *College of Material, Chemistry and Chemical Engineering, Key Laboratory of Organosilicon Chemistry and Material Technology, Ministry of Education, Hangzhou Normal University, Hangzhou, Zhejiang 311121, PR China*

**Corresponding Authors.** \*Email address: [libx@zstu.edu.cn](mailto:libx@zstu.edu.cn) (B. X. Li)

## 1. Supplementary Experiments

### 1.1. Preparation of polystyrene (PS) colloidal crystal templates

The monodisperse PS submicrospheres are prepared by an emulsifier-free emulsion polymerization method. Specifically, styrene is rinsed by 0.1 M NaOH aqueous solution and deionized water for three times, respectively, to remove the stabilizer. Then, 8.6 mL of the pretreated styrene and 170 mL deionized water are added into a four-neck flask. The mixture is stirred at 400 rpm by an electric blender and heated to 80 °C in N<sub>2</sub> atmosphere. When the reaction temperature reaches 80 °C, 10 mL of 0.1 M K<sub>2</sub>S<sub>2</sub>O<sub>8</sub> aqueous solution is injected into the mixture to trigger the polymerization of styrene. After the polymerization reaction continues for 5 h, the reaction system is cooled to room temperature by ice bath. The PS submicrospheres are collected from the latex and assembled into the PS colloidal crystal templates (CCTs) by centrifugation at 7000 rpm for 0.5 h. Finally, the as-prepared PS CCTs are dried at room temperature for further use.

### 1.2. Photoelectrochemical tests

The photoelectrochemical tests are conducted in a three-electrode system of an electrochemical workstation (CHI660E, China), with 0.1 M Na<sub>2</sub>SO<sub>4</sub> solution as electrolyte. The catalyst-coated fluorine-tin-oxide (FTO) glass, platinum wire and Ag/AgCl electrode are used as photoelectrode, counter electrode, and reference electrode, respectively. For preparing a photoelectrode, 4 mg photocatalyst and 10 μL naphthol are mixed with 390 μL deionized water by sonication to form a slurry, and 200 μL of the slurry was uniformly coated onto a FTO glass (1 cm × 1 cm), which is then dried naturally at room temperature. The transient photocurrent is measured under a chopped light irradiation (light on/off cycles: 30 s) from a 300 W Xe lamp, with a bias potential of 0.11 V. The electrochemical impedance spectra (EIS) are measured in

the frequency range of 0.01-10<sup>5</sup> Hz with an amplitude of 5 mV and a bias potential of 0 V vs. Ag/AgCl electrode. For comparison, the transient photocurrent tests are implemented in the Na<sub>2</sub>SO<sub>4</sub> solution electrolyte saturated with Ar and CO<sub>2</sub>, respectively.

### *1.3. Detection of H<sub>2</sub>O<sub>2</sub> generated in photocatalytic CO<sub>2</sub> reduction reaction*

Hydrogen peroxide (H<sub>2</sub>O<sub>2</sub>) generated in photocatalytic CO<sub>2</sub> reduction process is determined by an iodimetry method. For the liquid-solid photocatalytic system, 5 mg Cu<sub>0.01</sub>/3DOM-TiO<sub>2</sub> photocatalyst is dispersed in 2 mL CO<sub>2</sub>-saturated water. After being exposed to irradiation for 4 h, the suspension is filtered by a syringe filter to remove the catalyst particles for the subsequent detection. For the gas-solid photocatalytic system, 5 mg Cu<sub>0.01</sub>/3DOM-TiO<sub>2</sub> photocatalyst is put in the quartz tube, followed with injecting 0.1 mL H<sub>2</sub>O and blowing CO<sub>2</sub> gas into the tube. After 4 h irradiation, 2 mL H<sub>2</sub>O is added into the quartz tube to extract H<sub>2</sub>O<sub>2</sub> generated during the photocatalytic reaction, and the suspension is then filtered by a syringe filter. 1 mL of the filtrate is added into the mixture of 1 mL potassium hydrogen phthalate (C<sub>8</sub>H<sub>5</sub>KO<sub>4</sub>) aqueous solution (0.1 M) and 1 mL potassium iodide (KI) aqueous solution (0.4 M). H<sub>2</sub>O<sub>2</sub> can react with I<sup>-</sup> ions to produce I<sub>3</sub><sup>-</sup> ions which shows a characteristic absorption at 350 nm. The UV-vis absorption spectra of the testing solutions are recorded in the wavelength range of 300-500 nm on a Shimadzu UV-2600 spectrophotometer. The amount of I<sub>3</sub><sup>-</sup> is determined by UV-vis spectroscopy according to its characteristic absorption at 350 nm, and the corresponding amount of H<sub>2</sub>O<sub>2</sub> is calculated.

## 2. Supplementary Figures

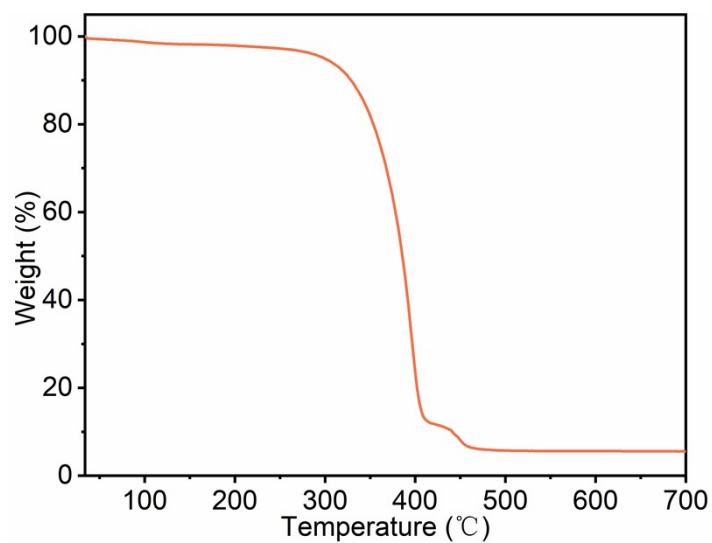

**Fig. S1.** Thermogravimetric curve of the colloidal crystal templates loaded with precursors.

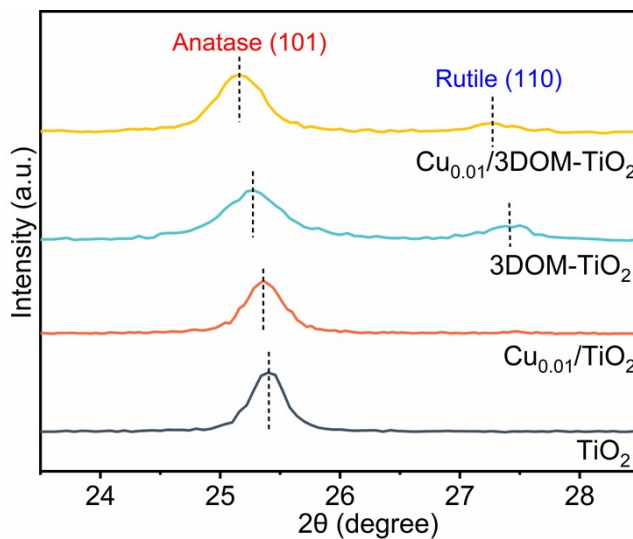

**Fig. S2.** Locally amplified XRD patterns of different photocatalysts.

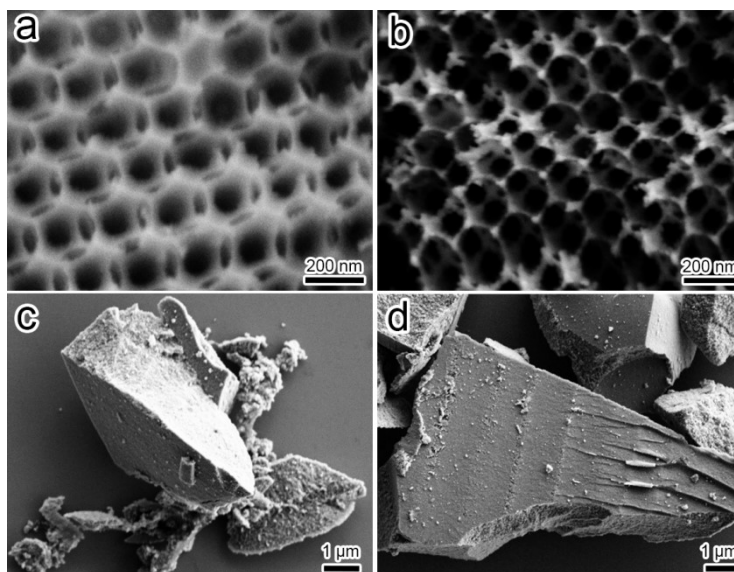

**Fig. S3.** SEM images of (a)  $\text{Cu}_{0.01}/3\text{DOM-TiO}_2$ , (b)  $3\text{DOM-TiO}_2$ , (c)  $\text{Cu}_{0.01}/\text{TiO}_2$ , (d)  $\text{TiO}_2$ .

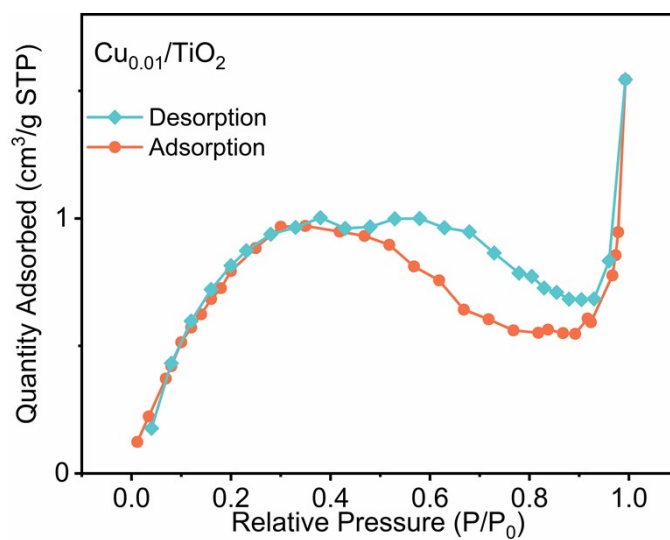

**Fig. S4.** Nitrogen adsorption-desorption isotherm of  $\text{Cu}_{0.01}/\text{TiO}_2$  sample.

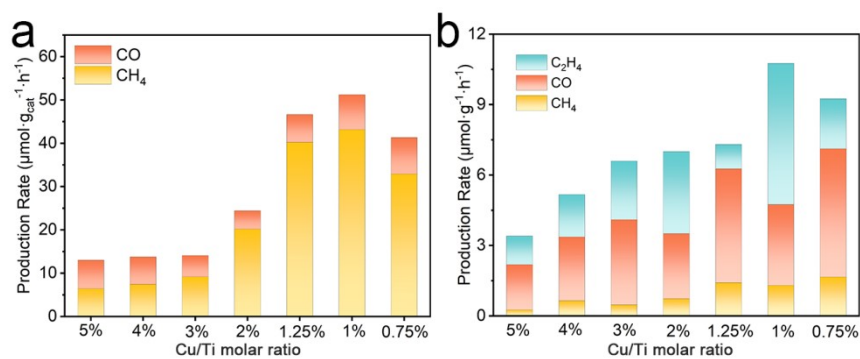

**Fig. S5.** Photocatalytic  $\text{CO}_2$  reduction performance in (a) gas-solid system and (b) liquid-solid system over the  $\text{Cu}_{0.01}/3\text{DOM TiO}_2$  catalysts with different Cu/Ti molar ratios.

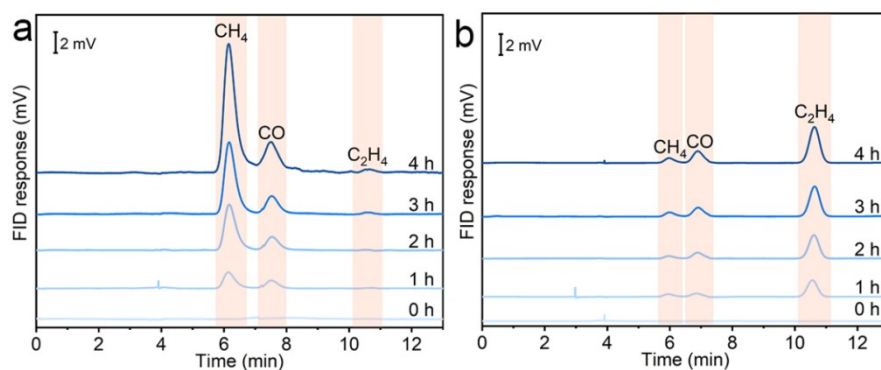

**Fig. S6.** FID response signals of  $\text{CH}_4$ , CO and  $\text{C}_2\text{H}_4$  in the photocatalytic  $\text{CO}_2$  reduction reaction with  $\text{Cu}_{0.01}/3\text{DOM-TiO}_2$  catalyst in (a) gas-solid catalytic system and (b) liquid-solid catalytic system.

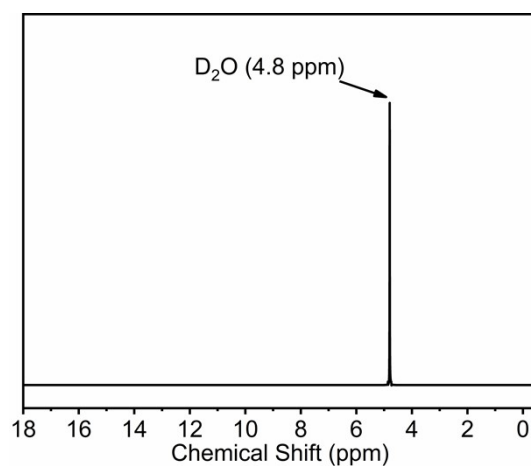

**Fig. S7.** NMR detection of the photocatalytic CO<sub>2</sub> reduction reaction solution.

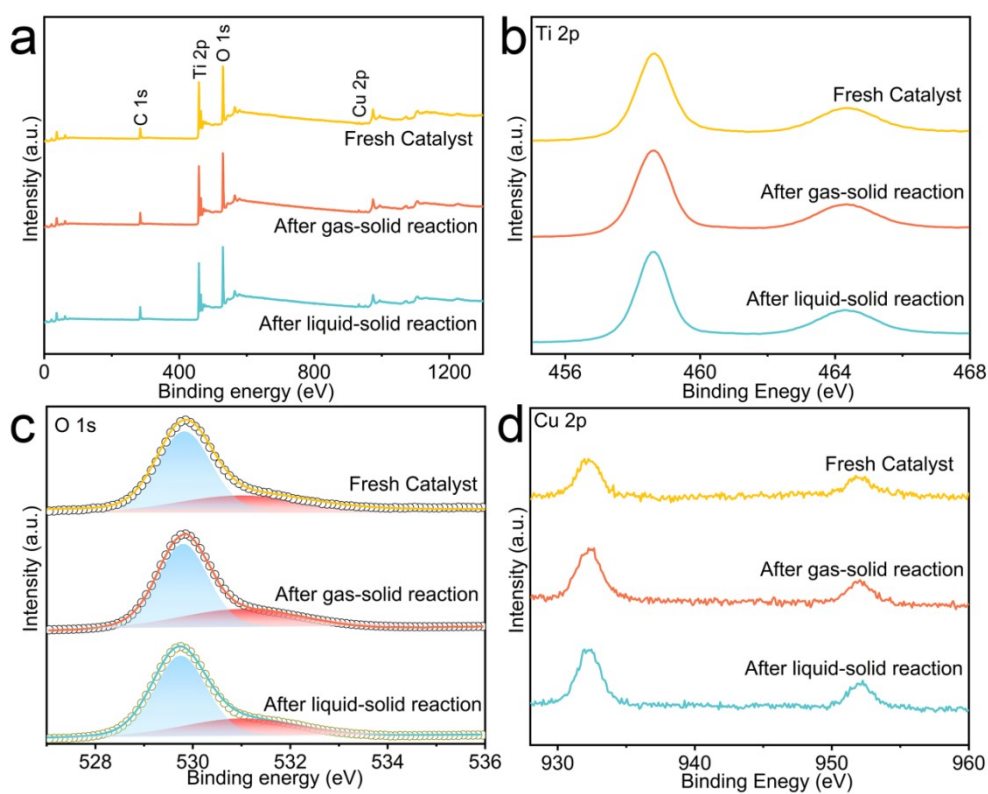

**Fig. S8.** (a) XPS survey, (b) Ti 2p, (c) O 1s, (d) Cu 2p XPS spectra of Cu<sub>0.01</sub>/3DOM-TiO<sub>2</sub> before and after cyclic reactions.

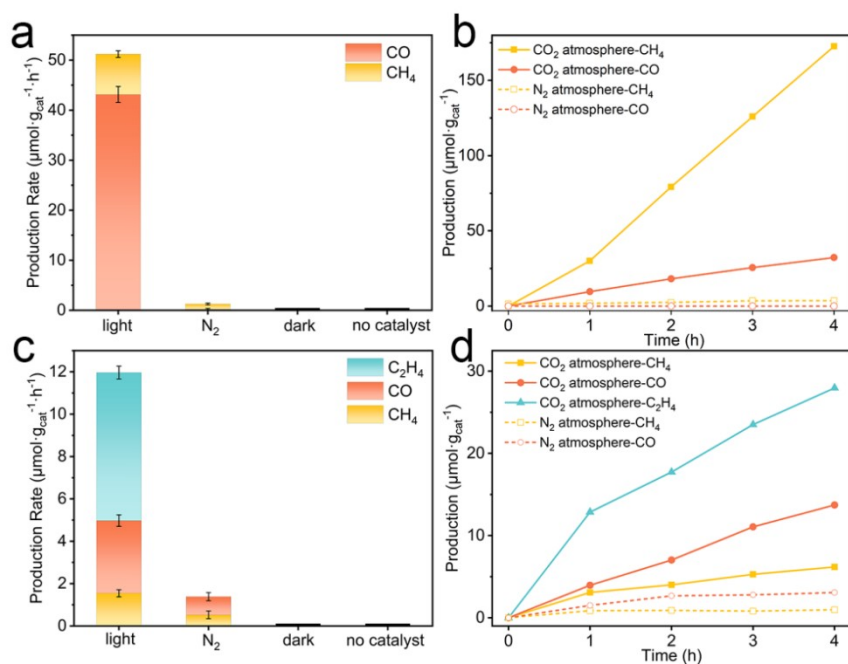

**Fig. S9.** (a) Product formation rates under different conditions and (b) time-dependent product yields in CO<sub>2</sub> and N<sub>2</sub> atmosphere for gas-solid catalytic system. (c) Product formation rates under different conditions and (d) time-dependent product yields in CO<sub>2</sub> and N<sub>2</sub> atmosphere for liquid-solid catalytic system.

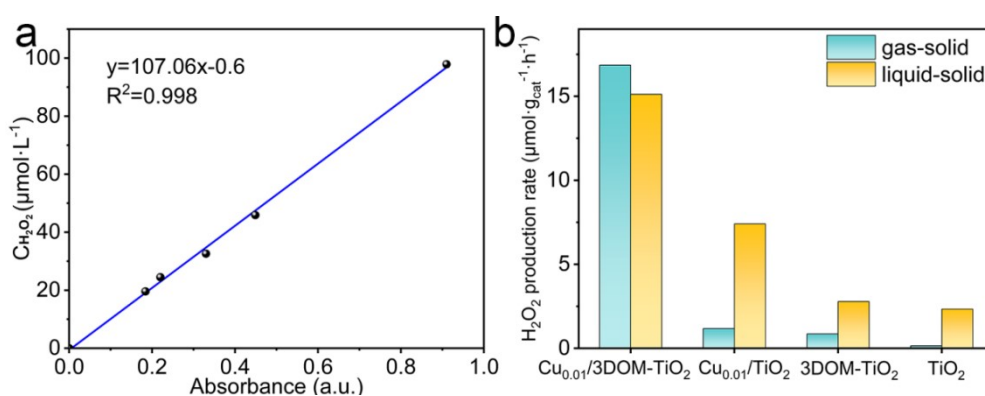

**Fig. S10.** (a) Standard calibration curve for the quantitation of hydrogen peroxide. (b) H<sub>2</sub>O<sub>2</sub> production rates over different photocatalysts in both reaction systems.



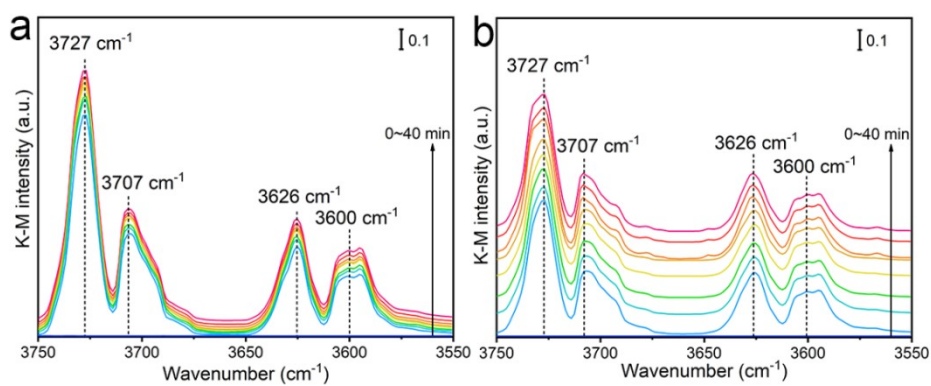

**Fig. S11.** *In situ* DRIFTS spectra in the region of 3550 ~ 3750  $\text{cm}^{-1}$  of the photocatalytic  $\text{CO}_2$  reduction with  $\text{Cu}_{0.01}/3\text{DOM-TiO}_2$  catalyst in two different systems: (a) liquid-solid catalytic system, (b) gas-solid catalytic system.

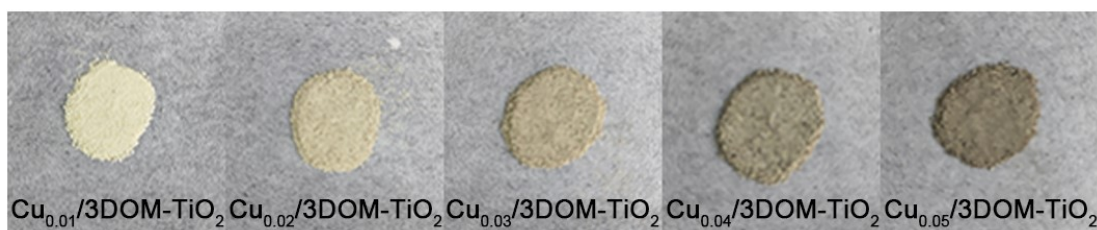

**Fig. S12.** Digital images of  $\text{Cu}_x/3\text{DOM-TiO}_2$  photocatalysts with different Cu contents.

### 3. Supplementary Tables

**Table S1.** Anatase and rutile TiO<sub>2</sub> contents of several different photocatalysts.

| Entry | Sample                                    | Anatase TiO <sub>2</sub> (wt%) | Rutile TiO <sub>2</sub> (wt%)* |
|-------|-------------------------------------------|--------------------------------|--------------------------------|
| 1     | Cu <sub>0.01</sub> /3DOM-TiO <sub>2</sub> | 86.14                          | 13.86                          |
| 2     | Cu <sub>0.01</sub> /TiO <sub>2</sub>      | 100                            | 0                              |
| 3     | 3DOM-TiO <sub>2</sub>                     | 86.20                          | 13.80                          |
| 4     | TiO <sub>2</sub>                          | 100                            | 0                              |

\*The mass fractions of rutile TiO<sub>2</sub> ( $W_{\text{Rutile}}$ ) are calculated according to the formula  $W_{\text{Rutile}} = A_{\text{Rutile}} / (0.884 A_{\text{Anatase}} + A_{\text{Rutile}})$ ,<sup>S1-S2</sup> where  $A_{\text{Anatase}}$  and  $A_{\text{Rutile}}$  are the integrated intensities of anatase (101) and rutile (110) XRD peaks, respectively.

**Table S2.** BET surface areas, pore volumes and average pore sizes of Cu<sub>0.01</sub>/3DOM-TiO<sub>2</sub>, 3DOM-TiO<sub>2</sub> and Cu<sub>0.01</sub>/TiO<sub>2</sub> samples.

| Photocatalyst                             | BET surface area<br>(m <sup>2</sup> /g) | Pore volume<br>(cm <sup>3</sup> /g) | Average pore size<br>(nm) |
|-------------------------------------------|-----------------------------------------|-------------------------------------|---------------------------|
| Cu <sub>0.01</sub> /3DOM-TiO <sub>2</sub> | 52.80                                   | 0.28                                | 18.59                     |
| 3DOM-TiO <sub>2</sub>                     | 48.97                                   | 0.22                                | 17.44                     |
| Cu <sub>0.01</sub> /TiO <sub>2</sub>      | 3.74                                    | 0.0014                              | 50.69                     |

**Table S3.** Product formation rates of photocatalytic CO<sub>2</sub> reduction with different

photocatalysts in liquid-solid catalytic system. Reaction conditions: 5 mg photocatalyst, 30 mL H<sub>2</sub>O, CO<sub>2</sub> atmosphere, Xe lamp with optical power density of 200 mW·cm<sup>2</sup>, 4 h irradiation.

| Entry | Photocatalyst                             | CH <sub>4</sub>                                                      | CO                                                                   | C <sub>2</sub> H <sub>4</sub>                                        |
|-------|-------------------------------------------|----------------------------------------------------------------------|----------------------------------------------------------------------|----------------------------------------------------------------------|
|       |                                           | ( $\mu\text{mol}\cdot\text{g}_{\text{cat}}^{-1}\cdot\text{h}^{-1}$ ) | ( $\mu\text{mol}\cdot\text{g}_{\text{cat}}^{-1}\cdot\text{h}^{-1}$ ) | ( $\mu\text{mol}\cdot\text{g}_{\text{cat}}^{-1}\cdot\text{h}^{-1}$ ) |
| 1     | Cu <sub>0.01</sub> /3DOM-TiO <sub>2</sub> | 1.54                                                                 | 3.43                                                                 | 6.99                                                                 |
| 2     | Cu <sub>0.01</sub> /TiO <sub>2</sub>      | 0                                                                    | 0.78                                                                 | 0                                                                    |
| 3     | 3DOM-TiO <sub>2</sub>                     | 0                                                                    | 1.91                                                                 | 0                                                                    |
| 4     | TiO <sub>2</sub>                          | 0                                                                    | 0.41                                                                 | 0                                                                    |

**Table S4.** Product formation rates of photocatalytic CO<sub>2</sub> reduction with different photocatalysts in gas-solid catalytic system. Reaction conditions: 5 mg photocatalyst, 1 mL H<sub>2</sub>O for providing water vapor, CO<sub>2</sub> atmosphere, Xe lamp with optical power density of 200 mW·cm<sup>2</sup>, 4 h irradiation.

| Entry | Photocatalyst                             | CH <sub>4</sub>                                                      | CO                                                                   |
|-------|-------------------------------------------|----------------------------------------------------------------------|----------------------------------------------------------------------|
|       |                                           | ( $\mu\text{mol}\cdot\text{g}_{\text{cat}}^{-1}\cdot\text{h}^{-1}$ ) | ( $\mu\text{mol}\cdot\text{g}_{\text{cat}}^{-1}\cdot\text{h}^{-1}$ ) |
| 1     | Cu <sub>0.01</sub> /3DOM-TiO <sub>2</sub> | 43.15                                                                | 8.06                                                                 |
| 2     | Cu <sub>0.01</sub> /TiO <sub>2</sub>      | 0                                                                    | 2.02                                                                 |
| 3     | 3DOM-TiO <sub>2</sub>                     | 0                                                                    | 2.80                                                                 |
| 4     | TiO <sub>2</sub>                          | 0                                                                    | 1.10                                                                 |

**Table S5.** Product formation rates from the cyclic experiments of the photocatalytic

CO<sub>2</sub> reduction with Cu<sub>0.01</sub>/3DOM-TiO<sub>2</sub> catalyst in liquid-solid catalytic system.

Reaction conditions: 5 mg photocatalyst, 30 mL H<sub>2</sub>O, CO<sub>2</sub> atmosphere, Xe lamp with optical power density of 200 mW·cm<sup>2</sup>, 4 h for each cycle.

| Cycle | CH <sub>4</sub>                                                      | CO                                                                   | C <sub>2</sub> H <sub>4</sub>                                        |
|-------|----------------------------------------------------------------------|----------------------------------------------------------------------|----------------------------------------------------------------------|
|       | ( $\mu\text{mol}\cdot\text{g}_{\text{cat}}^{-1}\cdot\text{h}^{-1}$ ) | ( $\mu\text{mol}\cdot\text{g}_{\text{cat}}^{-1}\cdot\text{h}^{-1}$ ) | ( $\mu\text{mol}\cdot\text{g}_{\text{cat}}^{-1}\cdot\text{h}^{-1}$ ) |
| 1     | 1.54                                                                 | 3.43                                                                 | 6.99                                                                 |
| 2     | 1.41                                                                 | 3.37                                                                 | 6.85                                                                 |
| 3     | 1.38                                                                 | 3.18                                                                 | 6.49                                                                 |
| 4     | 1.32                                                                 | 3.08                                                                 | 6.15                                                                 |

**Table S6.** Product formation rates from the cyclic experiments of the photocatalytic CO<sub>2</sub> reduction with Cu<sub>0.01</sub>/3DOM-TiO<sub>2</sub> catalyst in gas-solid catalytic system. Reaction conditions: 5 mg photocatalyst, 1 mL H<sub>2</sub>O for providing water vapor, CO<sub>2</sub> atmosphere, Xe lamp with optical power density of 200 mW·cm<sup>2</sup>, 4 h for each cycle.

| Cycle times | CH <sub>4</sub>                                                      | CO                                                                   |
|-------------|----------------------------------------------------------------------|----------------------------------------------------------------------|
|             | ( $\mu\text{mol}\cdot\text{g}_{\text{cat}}^{-1}\cdot\text{h}^{-1}$ ) | ( $\mu\text{mol}\cdot\text{g}_{\text{cat}}^{-1}\cdot\text{h}^{-1}$ ) |
| 1           | 43.15                                                                | 8.06                                                                 |
| 2           | 42.85                                                                | 7.46                                                                 |
| 3           | 42.64                                                                | 7.21                                                                 |
| 4           | 39.22                                                                | 6.80                                                                 |

**Table S7.** H<sub>2</sub>O<sub>2</sub> production rates in the photocatalytic CO<sub>2</sub> reduction reaction systems

with different photocatalysts.

| Entry | Photocatalyst                             | H <sub>2</sub> O <sub>2</sub> production rate in gas-                | H <sub>2</sub> O <sub>2</sub> production rate in                     |
|-------|-------------------------------------------|----------------------------------------------------------------------|----------------------------------------------------------------------|
|       |                                           | solid system                                                         | gas-solid system                                                     |
|       |                                           | ( $\mu\text{mol}\cdot\text{g}_{\text{cat}}^{-1}\cdot\text{h}^{-1}$ ) | ( $\mu\text{mol}\cdot\text{g}_{\text{cat}}^{-1}\cdot\text{h}^{-1}$ ) |
| 1     | Cu <sub>0.01</sub> /3DOM-TiO <sub>2</sub> | 16.85                                                                | 15.12                                                                |
| 2     | Cu <sub>0.01</sub> /TiO <sub>2</sub>      | 1.18                                                                 | 7.41                                                                 |
| 3     | 3DOM-TiO <sub>2</sub>                     | 0.86                                                                 | 2.78                                                                 |
| 4     | TiO <sub>2</sub>                          | 0.15                                                                 | 2.34                                                                 |

**Table S8.** Comparison between the catalytic activities of Cu<sub>0.01</sub>/3DOM-TiO<sub>2</sub> and the previously reported 3DOM-TiO<sub>2</sub> based photocatalysts for CO<sub>2</sub> reduction.

| Entry | Catalyst                                                         | Reactant                                     | Light                                               | Products<br>( $\mu\text{mol}\cdot\text{g}_{\text{cat}}^{-1}\cdot\text{h}^{-1}$ ) | Ref.<br>No.  |
|-------|------------------------------------------------------------------|----------------------------------------------|-----------------------------------------------------|----------------------------------------------------------------------------------|--------------|
| 1     | Cu <sub>0.01</sub> /3DOM-TiO <sub>2</sub>                        | CO <sub>2</sub> + H <sub>2</sub> O<br>vapor  | 300 W Xe lamp<br>(200 mW/cm <sup>2</sup> )          | CH <sub>4</sub> , 43.15<br>CO, 8.06                                              | This<br>work |
| 2     | Cu <sub>0.01</sub> /3DOM-TiO <sub>2</sub>                        | CO <sub>2</sub> + 30 mL<br>H <sub>2</sub> O  | 300 W Xe lamp<br>(200 mW/cm <sup>2</sup> )          | CH <sub>4</sub> , 1.54<br>CO, 3.43<br>C <sub>2</sub> H <sub>4</sub> , 6.99       | This<br>work |
| 3     | 3DOM Au <sub>8</sub> /TiO <sub>2</sub>                           | CO <sub>2</sub> + H <sub>2</sub> O<br>vapor  | 300 W Xe lamp<br>with a 420 nm UV-<br>cutoff filter | CH <sub>4</sub> , 2.88                                                           | S3           |
| 4     | 3DOM Pt@CdS/TiO <sub>2</sub>                                     | CO <sub>2</sub> + H <sub>2</sub> O<br>vapor  | 300 W Xe lamp<br>(100 mW/cm <sup>2</sup> )          | CH <sub>4</sub> , 36.8<br>CO, 0.7<br>H <sub>2</sub> , 16.2                       | S4           |
| 5     | AuPd/3DOM-TiO <sub>2</sub>                                       | CO <sub>2</sub> + 2 mL<br>H <sub>2</sub> O   | 300 W Xe lamp<br>(80 mW/cm <sup>2</sup> )           | CH <sub>4</sub> , 18.5<br>CO, 1.2<br>H <sub>2</sub> , 18.6                       | S5           |
| 6     | Pt/3DOM TiO <sub>2</sub> -SiO <sub>2</sub>                       | CO <sub>2</sub> + 1 mL<br>H <sub>2</sub> O   | 300 W Xe lamp<br>with an AM 1.5<br>filter           | CH <sub>4</sub> , 9.7<br>CO, 1.8<br>H <sub>2</sub> , 58.7                        | S6           |
| 7     | Au/RuO <sub>2</sub> /3DOM TiO <sub>2</sub> -<br>SiO <sub>2</sub> | CO <sub>2</sub> + 1 mL<br>H <sub>2</sub> O   | 300 W Xe lamp<br>with an AM 1.5<br>filter           | CH <sub>4</sub> , 5.7<br>CO, 1.2<br>H <sub>2</sub> , 2.5                         | S7           |
| 8     | g-C <sub>3</sub> N <sub>4</sub> /Pt/3DOM-<br>TiO <sub>2</sub> @C | CO <sub>2</sub> + 2.5 mL<br>H <sub>2</sub> O | 300 W Xe lamp<br>with a 420 nm UV-<br>cutoff filter | CH <sub>4</sub> , 6.56<br>CO, 1.47<br>H <sub>2</sub> , 0.82                      | S8           |
| 9     | MoS <sub>2</sub> /3DOM-TiO <sub>2</sub>                          | CO <sub>2</sub> + 2.5 mL<br>H <sub>2</sub> O | 300 W Xe lamp                                       | CH <sub>4</sub> , 2.83<br>CO, 1.47                                               | S9           |

## References

- S1 Q. Xu, Y. Ma, J. Zhang, X. Wang, Z. Feng and C. Li, Enhancing hydrogen production activity and suppressing CO formation from photocatalytic biomass reforming on Pt/TiO<sub>2</sub> by optimizing anatase–rutile phase structure, *J. Catal.*, 2011, **278**, 329-335.

- S2 X. Wang, S. Shen, Z. Feng and C. Li, Time-resolved photoluminescence of anatase/rutile TiO<sub>2</sub> phase junction revealing charge separation dynamics, *Chin. J. Catal.*, 2016, **37**, 2059-2068.
- S3 J. Jiao, Y. Wei, Z. Zhao, W. Zhong, J. Liu, J. Li, A. Duan and G. Jiang, Synthesis of 3D ordered macroporous TiO<sub>2</sub>-supported Au nanoparticle photocatalysts and their photocatalytic performances for the reduction of CO<sub>2</sub> to methane, *Catal. Today* 2015, **258**, 319-326.
- S4 Y. Wei, J. Jiao, Z. Zhao, W. Zhong, J. Li, J. Liu, G. Jiang and A. Duan, 3D ordered macroporous TiO<sub>2</sub>-supported Pt@CdS core-shell nanoparticles: design, synthesis and efficient photocatalytic conversion of CO<sub>2</sub> with water to methane, *J. Mater. Chem. A*, 2015, **3**, 11074-11085.
- S5 J. Jiao, Y. Wei, Y. Zhao, Z. Zhao, A. Duan, J. Liu, Y. Pang, J. Li, G. Jiang and Y. Wang, AuPd/3DOM-TiO<sub>2</sub> catalysts for photocatalytic reduction of CO<sub>2</sub>: High efficient separation of photogenerated charge carriers, *Appl. Catal., B*, 2017, **209**, 228-239.
- S6 C. Dong, C. Lian, S. Hu, Z. Deng, J. Gong, M. Li, H. Liu, M. Xing and J. Zhang, Size-dependent activity and selectivity of carbon dioxide photocatalytic reduction over platinum nanoparticles, *Nat. Commun.*, 2018, **9**, 1252.
- S7 C. Dong, S. Hu, M. Xing and J. Zhang, Enhanced photocatalytic CO<sub>2</sub> reduction to CH<sub>4</sub> over separated dual co-catalysts Au and RuO<sub>2</sub>, *Nanotechnology*, 2018, **29**, 154005.
- S8 C. Wang, X. Liu, W. He, Y. Zhao, Y. Wei, J. Xiong, J. Liu, J. Li, W. Song, X. Zhang and Z. Zhao, All-solid-state Z-scheme photocatalysts of g-C<sub>3</sub>N<sub>4</sub>/Pt/macroporous-(TiO<sub>2</sub>@carbon) for selective boosting visible-light-driven conversion of CO<sub>2</sub> to CH<sub>4</sub>, *J. Catal.*, 2020, **389**, 440-449.
- S9 Y. Li, J. Tang, Y. Wei, W. He, Z. Tang, X. Zhang, J. Xiong and Z. Zhao, The heterojunction between 3D ordered macroporous TiO<sub>2</sub> and MoS<sub>2</sub> nanosheets for enhancing visible-light driven CO<sub>2</sub> reduction, *J. CO<sub>2</sub> Util.*, 2021, **51**, 101648.
